# Supplementary material for: The predictive prognostic factors for polymyositis/dermatomyositis-associated interstitial lung disease
Source: Springer Nature journal article supplement (doi:10.1186/s13075-017-1506-7), 2018-01-11
Supplement: MOESM1 [file 15359384]

**Table S1 The demographic data of PM/DM patients with ILD.**

| <b>PM/DM-ILD (n = 116)</b>         |                                               |                                  |
|------------------------------------|-----------------------------------------------|----------------------------------|
| Women <i>n</i> (%)                 |                                               | 83 /116 (71.6%)                  |
| Age (year)                         |                                               | 56.0 ± 14.8 <sup>a</sup>         |
| Smoking <i>n</i> (%)               |                                               | 37 /106 (34.9%)                  |
| Follow-up period (months)          |                                               | 47.0 [21.0-75.5] <sup>b</sup>    |
| Type ( <i>n</i> )                  |                                               | PM 22, DM 51, CADM 43            |
| Manifestation <i>n</i> (%)         | Eruption                                      | 97 /115 (84.3%)                  |
|                                    | Muscle weakness                               | 76/115 (66.1%)                   |
|                                    | Dysfunction of swallowing                     | 22/114 (19.3%)                   |
|                                    | fever                                         | 53/115 (46.1%)                   |
| Baseline data                      | CK (U/l)                                      | 360 [115-1,496] <sup>b</sup>     |
|                                    | LDH (U/l)                                     | 369 [279-526] <sup>b</sup>       |
|                                    | KL-6 (U/ml)                                   | 673 [453-1,030] <sup>b</sup>     |
|                                    | CRP (mg/dl)                                   | 0.57 [0.15-1.78] <sup>b</sup>    |
|                                    | Lymphocyte (/μl)                              | 971 [696-1,386] <sup>b</sup>     |
|                                    | Albumin (g/dl)                                | 3.42 ± 0.56 <sup>a</sup>         |
|                                    | PaCO <sub>2</sub> (mmHg)                      | 37.3 [34.3-40.3] <sup>b</sup>    |
|                                    | Ferritin (ng/ml)                              | 360 [165-843] <sup>b</sup>       |
| Autoantibody <i>n</i> (%)          | IgG (mg/dl)                                   | 1,476 [1,295-1,813] <sup>b</sup> |
|                                    | Anti-Jo-1 Ab                                  | 21/ 114 (18.4%)                  |
|                                    | Anti-ARS Ab                                   | 9/ 45 (20.0%)                    |
|                                    | Anti-MDA5 Ab                                  | 8/31 (25.8%)                     |
|                                    | Anti-TIF-1γ Ab                                | 2/2 (100%)                       |
|                                    | ANA (>80×)                                    | 33/111 (29.7%)                   |
|                                    | Anti-SS-A Ab                                  | 15/80 (18.8%)                    |
| Malignancy (<3 years) <i>n</i> (%) |                                               | 21/112 (18.8%)                   |
|                                    | Initial PSL dose (mg/kg/day)                  | 0.83 ± 0.29 <sup>a</sup>         |
| Treatment                          | mPSL pulse <i>n</i> (%)                       | 77 /116 (66.4%)                  |
|                                    | IVCY <i>n</i> (%)                             | 48 /116 (41.4%)                  |
|                                    | Calcineurin inhibitor <i>n</i> (%)            | 81/115 (70.4%)                   |
|                                    | Combination therapy <sup>c</sup> <i>n</i> (%) | 40 /116 (34.5%)                  |
|                                    | IVIg <i>n</i> (%)                             | 13/115 (11.3%)                   |
|                                    | Death <i>n</i> (%)                            | 28 /116 (24.1%)                  |
| Prognosis                          | ICU management <i>n</i> (%)                   | 13 /116 (11.2%)                  |
|                                    | Serious infection <i>n</i> (%)                | 38 /116 (32.8%)                  |

<sup>a</sup>The data are shown as the mean ± standard deviation.<sup>b</sup>Values are the median [interquartile range].<sup>c</sup>Combination therapy includes glucocorticoid, IVCY and calcineurin inhibitors.
