# Supplementary material for: The predictive prognostic factors for polymyositis/dermatomyositis-associated interstitial lung disease
Source: Springer Nature journal article supplement (doi:10.1186/s13075-017-1506-7), 2018-01-11
Supplement: MOESM2 [file 15359384]

**Table S2 Comparison of demographic data among each PM/DM subtype in PM/DM-ILD patients.**

| PM/DM-ILD ( <i>n</i> = 116)        | PM ( <i>n</i> = 22)                           | DM ( <i>n</i> = 51)              | CADM ( <i>n</i> = 43)            | <i>p</i> -Value                  |                 |
|------------------------------------|-----------------------------------------------|----------------------------------|----------------------------------|----------------------------------|-----------------|
| Women <i>n</i> (%)                 | 13 /22 (59.1%)                                | 40 /51 (78.4%)                   | 30 /43 (69.8%)                   | 0.23                             |                 |
| Age (year)                         | 56.2 ± 14.9 <sup>a</sup>                      | 60.0 ± 13.3 <sup>a</sup>         | 51.3 ± 15.4 <sup>a</sup>         | 0.016**                          |                 |
| Smoking <i>n</i> (%)               | 10 /21 (47.6%)                                | 13 /47 (27.7%)                   | 14 /38 (36.8%)                   | 0.27                             |                 |
| Follow-up period (months)          | 57.9 [48.4-78.7] <sup>b</sup>                 | 42.4 [18.8-69.0] <sup>b</sup>    | 39.5 [14.5-80.0] <sup>b</sup>    | 0.081                            |                 |
| Baseline data                      | CK (U/l)                                      | 1,956 [1,067-4,399] <sup>b</sup> | 609 [211-1,773] <sup>b</sup>     | 83 [57-183] <sup>b</sup>         | <0.001**        |
|                                    | LDH (U/l)                                     | 449 [374-564] <sup>b</sup>       | 437 [341-590] <sup>b</sup>       | 284 [242-343] <sup>b</sup>       | <0.001**        |
|                                    | KL-6 (U/ml)                                   | 685 [490-1,709] <sup>b</sup>     | 759 [463-1,129] <sup>b</sup>     | 657 [413-911] <sup>b</sup>       | 0.35            |
|                                    | CRP (mg/dl)                                   | 0.71 [0.18-1.95] <sup>b</sup>    | 0.62 [0.16-1.94] <sup>b</sup>    | 0.49 [0.15-1.32] <sup>b</sup>    | 0.44            |
|                                    | Lymphocyte (/μl)                              | 1,346 [983-1,553] <sup>b</sup>   | 971 [696-1,386] <sup>b</sup>     | 825 [592-1,041] <sup>b</sup>     | 0.022*          |
|                                    | Albumin (g/dl)                                | 3.42 ± 0.49 <sup>a</sup>         | 3.32 ± 0.61 <sup>a</sup>         | 3.55 ± 0.51 <sup>a</sup>         | 0.16            |
|                                    | PaCO <sub>2</sub> (mmHg)                      | 39.3 [38.2-41.8] <sup>b</sup>    | 37.0 [34.0-39.5] <sup>b</sup>    | 36.4 [34.1-39.9] <sup>b</sup>    | 0.14            |
|                                    | Ferritin (ng/ml)                              | 258 [165-305] <sup>b</sup>       | 960 [719-1,365] <sup>b</sup>     | 361 [116-645] <sup>b</sup>       | 0.032*          |
|                                    | IgG (mg/dl)                                   | 1,580 [1,341-2,285] <sup>b</sup> | 1,444 [1,221-1,731] <sup>b</sup> | 1,489 [1,358-1,811] <sup>b</sup> | 0.44            |
|                                    | Autoantibody<br><i>n</i> (%)                  | Anti-Jo-1 Ab                     | 8 /21 (38.1%)                    | 10 /51 (19.6%)                   | 3 /42 (7.1%)    |
| Anti-ARS Ab                        |                                               | 1 /2 (50.0%)                     | 3 /21 (14.3%)                    | 5 /22 (22.7%)                    | NA <sup>d</sup> |
| Anti-MDA5 Ab                       |                                               | 0 /1 (0%)                        | 4 /17 (23.5%)                    | 4 /13 (30.8%)                    | NA <sup>d</sup> |
| Anti-TIF-1γ Ab                     |                                               | 0 /0 (0%)                        | 2 /2 (100%)                      | 0 /0 (100%)                      | NA <sup>d</sup> |
| ANA (>80×)                         |                                               | 3 /20 (15.0%)                    | 22 /48 (45.8%)                   | 8 /43 (18.6%)                    | 0.005**         |
| Anti-SS-A Ab                       |                                               | 3 /14 (21.4%)                    | 8 /36 (22.2%)                    | 4 /30 (13.3%)                    | 0.63            |
| Malignancy (<3 years) <i>n</i> (%) | 3 /20 (15.0%)                                 | 12 /49 (24.5%)                   | 6 /43 (14.0%)                    | 0.39                             |                 |
| HRCT                               | Zone A                                        | 1.0 [0-1.0] <sup>b</sup>         | 1.0 [0-1.0] <sup>b</sup>         | 1.0 [0-1.0] <sup>b</sup>         | 0.90            |
|                                    | Zone B                                        | 1.0 [1.0-1.8] <sup>b</sup>       | 1.0 [0-2.0] <sup>b</sup>         | 1.0 [0-1.0] <sup>b</sup>         | 0.58            |
|                                    | Zone C                                        | 2.0 [1.3-3.0] <sup>b</sup>       | 1.0 [1.0-3.0] <sup>b</sup>       | 1.0 [1.0-2.0] <sup>b</sup>       | 0.22            |
|                                    | Zone D                                        | 4.0 [3.0-4.8] <sup>b</sup>       | 3.0 [2.0-4.0] <sup>b</sup>       | 3.0 [2.0-3.0] <sup>b</sup>       | 0.033*          |
|                                    | Zone total                                    | 8.0 [5.3-10.8] <sup>b</sup>      | 6.0 [3.0-10.0] <sup>b</sup>      | 6.0 [4.0-7.0] <sup>b</sup>       | 0.25            |
| Treatment                          | Initial PSL dose (mg/kg/day)                  | 0.77 ± 0.25 <sup>a</sup>         | 0.92 ± 0.28 <sup>a</sup>         | 0.72 ± 0.32 <sup>a</sup>         | 0.004**         |
|                                    | mPSL pulse <i>n</i> (%)                       | 10 /22 (45.5%)                   | 35 /51 (68.6%)                   | 32 /43 (74.4%)                   | 0.059           |
|                                    | IVCY <i>n</i> (%)                             | 6 /22 (27.3%)                    | 19 /51 (37.3%)                   | 23 /43 (53.5%)                   | 0.092           |
|                                    | Calcineurin inhibitor <i>n</i> (%)            | 8 /22 (36.4%)                    | 36 /50 (72.0%)                   | 37 /43 (86.0%)                   | <0.001**        |
|                                    | Combination therapy <sup>c</sup> <i>n</i> (%) | 2 /22 (9.1%)                     | 18 /51 (35.3%)                   | 20 /43 (46.5%)                   | 0.011*          |
|                                    | IVIg <i>n</i> (%)                             | 1 /22 (4.5%)                     | 10 /50 (20.0%)                   | 2 /43 (4.7%)                     | NA <sup>d</sup> |
| Prognosis                          | Death <i>n</i> (%)                            | 6 /22 (27.3%)                    | 15 /51 (29.4%)                   | 7 /43 (9.6%)                     | 0.31            |
|                                    | ICU management <i>n</i> (%)                   | 2 /22 (9.1%)                     | 7 /51 (13.7%)                    | 4 /43 (9.3%)                     | NA <sup>d</sup> |

<sup>a</sup> The data are shown as the mean ± standard deviation.

<sup>b</sup> Values are the median [interquartile range].

<sup>c</sup> Combination therapy includes glucocorticoid, IVCY and calcineurin inhibitors.

<sup>d</sup> Not applicable.

\**p* < 0.05, \*\**p* < 0.01.
