# Supplementary material for: The predictive prognostic factors for polymyositis/dermatomyositis-associated interstitial lung disease
Source: Springer Nature journal article supplement (doi:10.1186/s13075-017-1506-7), 2018-01-11
Supplement: MOESM3 [file 15359384]

**Table S3 Comparison of demographic data between survivors and non-survivors of PM/DM-ILD patients.**

| PM/DM-ILD (n = 116)                    | Non-survivor <sup>e</sup><br>(n = 14) | Survivor<br>(n = 102)            | p-Value         |
|----------------------------------------|---------------------------------------|----------------------------------|-----------------|
| Women n (%)                            | 8 /14 (57.1%)                         | 75 /102 (73.5%)                  | 0.22            |
| Type (n)                               | PM 1, DM 8, CADM 5                    | PM 21, DM 43, CADM 38            | 0.41            |
| Age (year)                             | 60.1 ± 9.6 <sup>a</sup>               | 55.5 ± 15.4 <sup>a</sup>         | 0.14            |
| Smoking n (%)                          | 4/11 (36.4%)                          | 33 /95 (34.7%)                   | 1.00            |
| Follow-up period (months)              | 1.65 [1.3-2.15] <sup>b</sup>          | 50.0 [32.7-79.6] <sup>b</sup>    | <0.001**        |
| Manifestation                          |                                       |                                  |                 |
| Eruption                               | 13 /14 (92.9%)                        | 84/101 (83.2%)                   | 0.69            |
| n (%)                                  |                                       |                                  |                 |
| Muscle weakness                        | 9 /14 (64.3%)                         | 67 /101 (66.3%)                  | 1.00            |
| Dysfunction of swallowing              | 3 /14 (21.4%)                         | 19 /100 (19.0%)                  | 0.73            |
| Fever                                  | 9 /14 (64.3%)                         | 44 /101 (43.6%)                  | 0.15            |
| Baseline data                          |                                       |                                  |                 |
| CK (U/l)                               | 377 [118-1,083] <sup>b</sup>          | 361 [118-1,691] <sup>b</sup>     | 0.79            |
| LDH (U/l)                              | 438 [337-538] <sup>b</sup>            | 364 [276-516] <sup>b</sup>       | 0.21            |
| KL-6 (U/ml)                            | 935 [809-1,230] <sup>b</sup>          | 612 [431-1,023] <sup>b</sup>     | 0.016*          |
| CRP (mg/dl)                            | 1.32 [0.58-1.96] <sup>b</sup>         | 0.49 [0.12-1.62] <sup>b</sup>    | 0.072           |
| Lymphocyte (/μl)                       | 714 [398-909] <sup>b</sup>            | 1,013 [730-1,425] <sup>b</sup>   | 0.002**         |
| Albumin (g/dl)                         | 3.03 ± 0.54 <sup>a</sup>              | 3.46 ± 0.55 <sup>a</sup>         | 0.014*          |
| PaCO <sub>2</sub> (mmHg)               | 32.6 [31.2-36.0] <sup>b</sup>         | 37.8 [35.3-40.7] <sup>b</sup>    | 0.005**         |
| Ferritin (ng/ml)                       | 658 [148-1,210] <sup>b</sup>          | 342 [165-734] <sup>b</sup>       | 0.45            |
| IgG (mg/dl)                            | 1,714 [1,436-1,876] <sup>b</sup>      | 1,475 [1,287-1,784] <sup>b</sup> | 0.39            |
| Autoantibody                           |                                       |                                  |                 |
| Anti-Jo-1 Ab                           | 1/ 14 (7.1%)                          | 20 /100 (20.0%)                  | 0.46            |
| n (%)                                  |                                       |                                  |                 |
| Anti-ARS Ab                            | 0 /3 (0%)                             | 9 /42 (21.4%)                    | 1.00            |
| Anti-MDA5 Ab                           | -                                     | 8 /31 (25.8%)                    | NA <sup>f</sup> |
| Anti-TIF-1γ Ab                         | -                                     | 2 /2 (100%)                      | NA <sup>f</sup> |
| ANA (>80×)                             | 4 /12 (33.3%)                         | 29 /99 (29.3%)                   | 0.75            |
| Anti-SS-A Ab                           | 0 /7 (0%)                             | 15 /73 (20.5%)                   | 0.34            |
| Malignancy (<3 years) n (%)            | 3 /12 (25.0%)                         | 18 /100 (18.0%)                  | 0.69            |
| HRCT                                   |                                       |                                  |                 |
| Zone A                                 | 2.0 [1.0-2.0] <sup>c</sup>            | 1.0 [0-1.0] <sup>c</sup>         | < 0.001**       |
| Zone B                                 | 2.0 [1.0-2.8] <sup>c</sup>            | 1.0 [0-1.0] <sup>c</sup>         | 0.001**         |
| Zone C                                 | 2.0 [1.0-3.8] <sup>c</sup>            | 1.0 [1.0-2.0] <sup>c</sup>       | 0.069           |
| Zone D                                 | 4.0 [3.0-4.8] <sup>c</sup>            | 3.0 [2.0-4.0] <sup>c</sup>       | 0.021*          |
| Zone total                             | 10.0 [6.5-13.5] <sup>c</sup>          | 6.0 [4.0-8.3] <sup>c</sup>       | 0.004**         |
| Treatment                              |                                       |                                  |                 |
| Initial PSL dose (mg/kg/day)           | 0.96 ± 0.24 <sup>a</sup>              | 0.80 ± 0.31 <sup>a</sup>         | 0.061           |
| mPSL pulse n (%)                       | 14 /14 (100%)                         | 63 /102 (61.8%)                  | 0.002**         |
| IVCY n (%)                             | 11 /14 (78.6%)                        | 37 /102 (36.3%)                  | 0.003**         |
| Calcineurin inhibitor n (%)            | 13 /14 (92.9%)                        | 68 /101 (67.3%)                  | 0.062           |
| Combination therapy <sup>c</sup> n (%) | 10 /14 (71.4%)                        | 30 /102 (29.4%)                  | 0.005**         |
| IVIg n (%)                             | 4 /14 (28.6%)                         | 9 /101 (8.9%)                    | 0.052           |

|         |                                |                |                 |          |
|---------|--------------------------------|----------------|-----------------|----------|
| Outcome | ICU management <i>n</i> (%)    | 9 /14 (64.3%)  | 4 /102 (3.9%)   | <0.001** |
|         | Serious infection <i>n</i> (%) | 11 /14 (78.6%) | 27 /102 (26.5%) | <0.001** |
|         | ST <sup>d</sup> <i>n</i> (%)   | 8 /14 (57.1%)  | 63 /96 (65.6%)  | 0.56     |
|         | β-D-glucan <i>n</i> (%)        | 6 /13 (46.2%)  | 8 /95 (8.4%)    | 0.002**  |
|         | CMV treatment <i>n</i> (%)     | 5 /13 (38.5%)  | 18 /93 (19.4%)  | 0.15     |

<sup>a</sup> The data are shown as the mean ± standard deviation.

<sup>b</sup> Values are the median [interquartile range].

<sup>c</sup> Combination therapy includes glucocorticoid, IVCY and calcineurin inhibitors.

<sup>d</sup> ST stands for sulfamethoxazole/trimethoprim.

<sup>e</sup> The non-survivor group includes the patients who die within 6 months after the diagnosis of PM/DM.

<sup>f</sup> Not applicable.

\**p* < 0.05, \*\**p* < 0.01.
