# Supplementary material for: The predictive prognostic factors for polymyositis/dermatomyositis-associated interstitial lung disease
Source: Springer Nature journal article supplement (doi:10.1186/s13075-017-1506-7), 2018-01-11
Supplement: MOESM4 [file 15359384]

**Table S4 Comparison of demographic data between PM/DM-ILD patients with or without complication of serious infection<sup>a</sup>.**

| PM/DM-ILD ( <i>n</i> = 116)        |                              | Infection ( <i>n</i> = 38)       | Non-infection ( <i>n</i> = 78)   | <i>p</i> -Value          |      |
|------------------------------------|------------------------------|----------------------------------|----------------------------------|--------------------------|------|
| Women <i>n</i> (%)                 |                              | 24 /38 (63.2%)                   | 59 /78 (75.6%)                   | 0.16                     |      |
| Type ( <i>n</i> )                  |                              | PM 7, DM 24, CADM 7              | PM 15, DM 27, CADM 36            | 0.007**                  |      |
| Age (year)                         |                              | 58.9 ± 13.9 <sup>b</sup>         | 54.7 ± 15.2 <sup>b</sup>         | 0.15                     |      |
| Smoking <i>n</i> (%)               |                              | 10 /35 (28.6%)                   | 27 /71 (38.0%)                   | 0.34                     |      |
| Follow-up period (months)          |                              | 32.1 [2.8-62.1] <sup>c</sup>     | 49.1 [31.6-79.6] <sup>c</sup>    | 0.024*                   |      |
| Manifestation<br><i>n</i> (%)      | Eruption                     | 32 /38 (84.2%)                   | 65 /77 (84.4%)                   | 0.98                     |      |
|                                    | Muscle weakness              | 28 /38 (73.7%)                   | 48 /77 (62.3%)                   | 0.23                     |      |
|                                    | Dysfunction of swallowing    | 9 /38 (23.7%)                    | 13 / 76 (17.1%)                  | 0.40                     |      |
|                                    | Fever                        | 21 /38 (55.3%)                   | 32 / 77 (41.6%)                  | 0.17                     |      |
| Baseline data                      | CK (U/l)                     | 418 [191-1,136] <sup>c</sup>     | 220 [76-1,887] <sup>c</sup>      | 0.40                     |      |
|                                    | LDH (U/l)                    | 420 [335-574] <sup>c</sup>       | 343 [258-486] <sup>c</sup>       | 0.005**                  |      |
|                                    | KL-6 (U/ml)                  | 848 [605-1,231] <sup>c</sup>     | 572 [405-978] <sup>c</sup>       | 0.014*                   |      |
|                                    | CRP (mg/dl)                  | 0.9 [0.34-1.99] <sup>c</sup>     | 0.30 [0.10-1.51] <sup>c</sup>    | 0.032*                   |      |
|                                    | Lymphocyte (/μl)             | 848 [552-1,177] <sup>c</sup>     | 1,008 [735-1,435] <sup>c</sup>   | 0.040*                   |      |
|                                    | Albumin (g/dl)               | 3.18 ± 0.52 <sup>b</sup>         | 3.53 ± 0.55 <sup>b</sup>         | 0.003**                  |      |
|                                    | PaCO <sub>2</sub> (mmHg)     | 36.0 [31.5-38.8] <sup>c</sup>    | 38.0 [35.5-41.5] <sup>c</sup>    | 0.016*                   |      |
|                                    | Ferritin (ng/ml)             | 462 [223-1,369] <sup>c</sup>     | 313 [142-666] <sup>c</sup>       | 0.071                    |      |
| Autoantibody<br><i>n</i> (%)       | IgG (mg/dl)                  | 1,420 [1,208-1,714] <sup>c</sup> | 1,475 [1,287-1,784] <sup>c</sup> | 0.12                     |      |
|                                    | Anti-Jo-1 Ab                 | 7 /38 (18.4%)                    | 14 /76 (18.4%)                   | 1.00                     |      |
|                                    | Anti-ARS Ab                  | 4 /17 (23.5%)                    | 5 /28 (17.9%)                    | 0.71                     |      |
|                                    | Anti-MDA5 Ab                 | 4 /15 (26.7%)                    | 4 /16 (25.0%)                    | 1.00                     |      |
|                                    | Anti-TIF-1γ Ab               | -                                | 2 /2 (100%)                      | NA <sup>c</sup>          |      |
|                                    | ANA (>80×)                   | 10 /35 (28.6%)                   | 23 /76 (30.3%)                   | 0.86                     |      |
|                                    | Anti-SS-A Ab                 | 3 /23 (13.0%)                    | 12 /57 (21.1%)                   | 0.54                     |      |
| Malignancy (<3 years) <i>n</i> (%) |                              | 8 /36 (22.2%)                    | 13 /76 (17.1%)                   | 0.52                     |      |
| HRCT                               | Zone A                       | 1.0 [0-2.0] <sup>c</sup>         | 1.0 [0-1.0] <sup>c</sup>         | 0.054                    |      |
|                                    | Zone B                       | 1.0 [1.0-2.0] <sup>c</sup>       | 1.0 [0-1.0] <sup>c</sup>         | 0.049*                   |      |
|                                    | Zone C                       | 2.0 [1.0-3.0] <sup>c</sup>       | 1.0 [1.0-2.0] <sup>c</sup>       | 0.036*                   |      |
|                                    | Zone D                       | 3.0 [2.0-4.0] <sup>c</sup>       | 3.0 [2.0-4.0] <sup>c</sup>       | 0.068                    |      |
|                                    | Zone total                   | 7.0 [4.0-11.0] <sup>c</sup>      | 6.0 [4.0-8.0] <sup>c</sup>       | 0.031*                   |      |
| Treatment                          | Initial PSL dose (mg/kg/day) | 0.94 ± 0.30 <sup>b</sup>         | 0.76 ± 0.29 <sup>b</sup>         | 0.005**                  |      |
|                                    | Accumulative                 | 1 month                          | 23.7 ± 7.5 <sup>b</sup>          | 21.5 ± 7.7 <sup>b</sup>  | 0.38 |
|                                    | PSL dose<br>(mg/kg)          | 2 months                         | 41.4 ± 15.2 <sup>b</sup>         | 38.7 ± 13.3 <sup>b</sup> | 0.62 |
|                                    |                              | 4 months                         | 64.2 ± 28.0 <sup>b</sup>         | 64.0 ± 20.9 <sup>b</sup> | 0.61 |
|                                    |                              | 6 months                         | 90.0 ± 31.9 <sup>b</sup>         | 82.8 ± 27.2 <sup>b</sup> | 0.60 |
|                                    | mPSL pulse <i>n</i> (%)      | 31 /38 (81.6%)                   | 46 /78 (59.0%)                   | 0.016*                   |      |
|                                    | IVCY <i>n</i> (%)            | 25 /38 (65.8%)                   | 23 /78 (29.5%)                   | <0.001**                 |      |

|         |                                               |                |                |          |
|---------|-----------------------------------------------|----------------|----------------|----------|
|         | Calcineurin inhibitor <i>n</i> (%)            | 34 /38 (89.5%) | 47 /77 (61.0%) | 0.002**  |
|         | Combination therapy <sup>d</sup> <i>n</i> (%) | 23 /38 (60.5%) | 17 /78 (21.8%) | <0.001** |
|         | IVIg <i>n</i> (%)                             | 6 /38 (15.8%)  | 7 /77 (9.1%)   | 0.35     |
| Outcome | ICU management <i>n</i> (%)                   | 10 /38 (26.3%) | 3 /78 (3.8%)   | 0.001**  |
|         | Death <i>n</i> (%)                            | 11 /38 (28.9%) | 3 /78 (3.8%)   | <0.001** |

<sup>a</sup>The infection group includes the PM/DM-ILD patients who have the complication of serious infections which need intravenous antibiotic therapy or longer hospitalization within 6 months after the diagnosis.

<sup>b</sup>The data are shown as the mean  $\pm$  standard deviation

<sup>c</sup>Values are the median [interquartile range]

<sup>d</sup>Combination therapy including mPSL, IVCY, and calcineurin inhibitor

<sup>e</sup>Not applicable

\* $p < 0.05$ , \*\* $p < 0.01$
